# Supplementary material for: Controlled synthesis and photocatalysis of sea urchin-like Fe3O4@TiO2@Ag nanocomposites
Source: Royal Society of Chemistry journal article supplement (doi:10.1039/c5nr08624h), 2016-01-01
Supplement: c5nr08624h1.pdf [file c5nr08624h1.pdf]

Supporting Information

**Controlled Synthesis and Photocatalysis of Sea Urchin-Like  
 $\text{Fe}_3\text{O}_4@\text{TiO}_2@\text{Ag}$  Nanocomposite**

Yilin Zhao, Chengran Tao, Gang Xiao, Guipeng Wei, Linghui Li, Changxia Liu, Haijia Su\*

**Table S1** The surface areas and average pore sizes of  $\text{Fe}_3\text{O}_4@\text{TiO}_2@\text{Ag}$  NSs with different hydrothermal reaction time.

| Time(h) | surface areas( $\text{m}^2 \text{g}^{-1}$ ) | average pore sizes (nm) |
|---------|---------------------------------------------|-------------------------|
| 1       | 289.420                                     | 4.077                   |
| 2       | 125.349                                     | 9.057                   |
| 3       | 73.187                                      | 11.935                  |

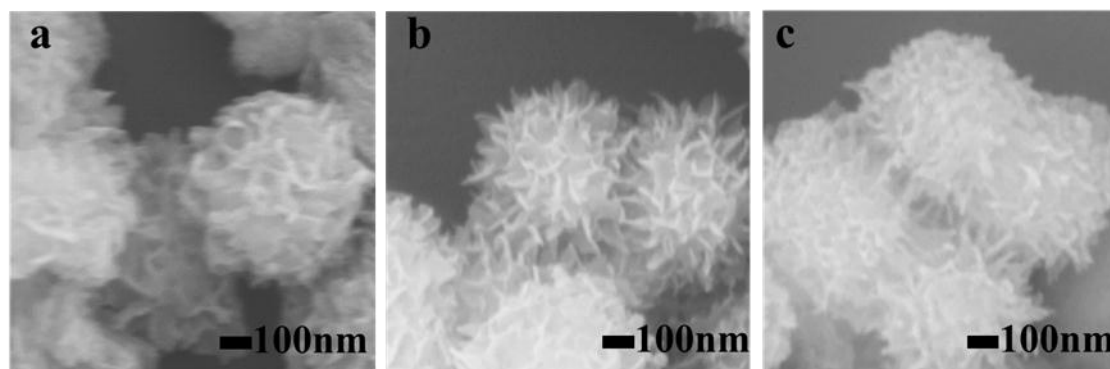

**Figure S1.** SEM images of  $\text{Fe}_3\text{O}_4@\text{TiO}_2@\text{Ag}$  NSs. Hydrothermal reaction  $120^\circ\text{C}$  for 1h (a), 2h (b), 3h (c)

**Table S2** The surface areas and average pore sizes of  $\text{Fe}_3\text{O}_4@\text{TiO}_2@\text{Ag}$  NSs with different hydrothermal temperature.

| Time(h) | surface areas( $\text{m}^2 \text{g}^{-1}$ ) | average pore sizes (nm) |
|---------|---------------------------------------------|-------------------------|
| 120     | 125.349                                     | 9.057                   |
| 140     | 113.245                                     | 8.545                   |
| 160     | 103.268                                     | 8.358                   |

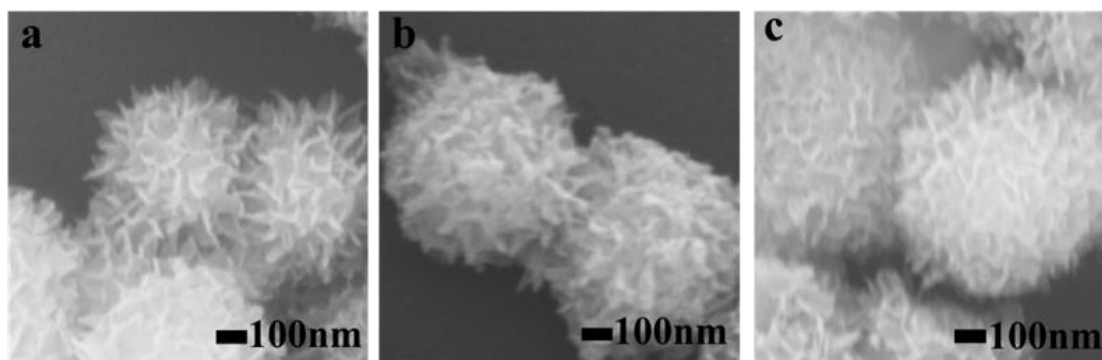

**Figure S2** SEM images of  $\text{Fe}_3\text{O}_4@\text{TiO}_2@\text{Ag}$  NSs. Temperature of hydrothermal reaction 2 hour for  $120^\circ\text{C}$  (a),  $140^\circ\text{C}$  (b), and  $160^\circ\text{C}$  (c).

**Table S3** Preparation of Photocatalyst-Containing Antibacterial Films.

| Antibacterial Films                                      | Weight of Photocatalyst (mg) | Wt. (%) |
|----------------------------------------------------------|------------------------------|---------|
| $\text{Fe}_3\text{O}_4@\text{TiO}_2$ NSs films           | 0.15                         | 5.86    |
| $\text{Fe}_3\text{O}_4@\text{TiO}_2@\text{Ag}$ NSs films | 0.16                         | 6.22    |
